# Supplementary material for: Tunable TiO2–BN–Pd nanofibers by combining electrospinning and atomic layer deposition to enhance photodegradation of acetaminophen
Source: Royal Society of Chemistry journal article supplement (doi:10.1039/d1dt03715c), 2022-01-01
Supplement: d1dt03715c1.pdf [file d1dt03715c1.pdf]

## S1. Optical characterization: calculation details

Detailed calculation of the absorption and scattering coefficients for quantum efficiency values:

$$K = \frac{1 - R_{\infty}}{2d(1 + R_{\infty})} \ln\left(\frac{R_{\infty}(1 - R_{\infty}R_0)}{R_{\infty} - R_0}\right)$$

(1)

$$S = \frac{1 - R_{\infty}}{2d(1 - R_{\infty}^2)} \ln\left(\frac{R_{\infty}(1 - R_{\infty}R_0)}{R_{\infty} - R_0}\right)$$

(2)

Linear absorption and scattering coefficients  $a$  and  $s$  can be calculated as:

$$K = 2a \tag{3}$$

$$S = \frac{3s(1 - g) - a}{4} \tag{4}$$

where  $K$ ,  $S$ ,  $d$  and  $g$  are diffuse absorption coefficient, diffuse scattering coefficient, sample thickness (cm) and  $g$  is scattering anisotropy factor.
